# Supplementary material
Source: MDPI journal article supplement (https://www.mdpi.com/2075-5309/13/2/450)
Supplement: s1 [file s1 › buildings-2166055-supplementary.pdf]

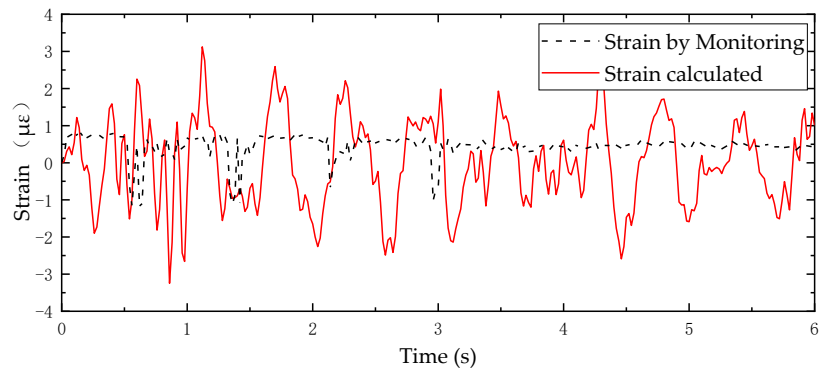

Figure S1: Comparison between measured dynamic strain and simulation results of DSS-01

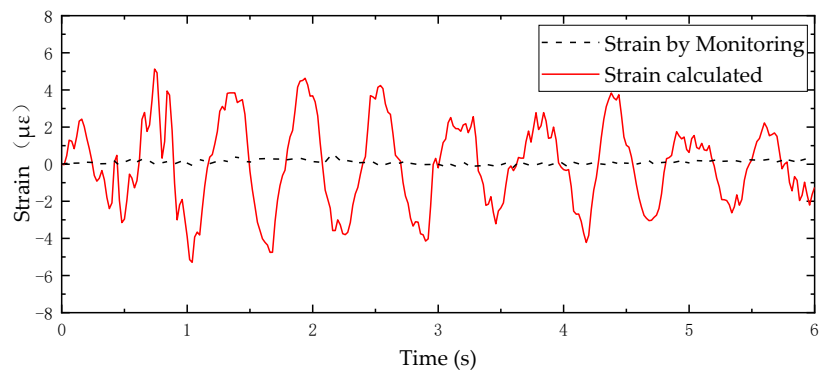

Figure S2: Comparison between measured dynamic strain and simulation results of DSS-02

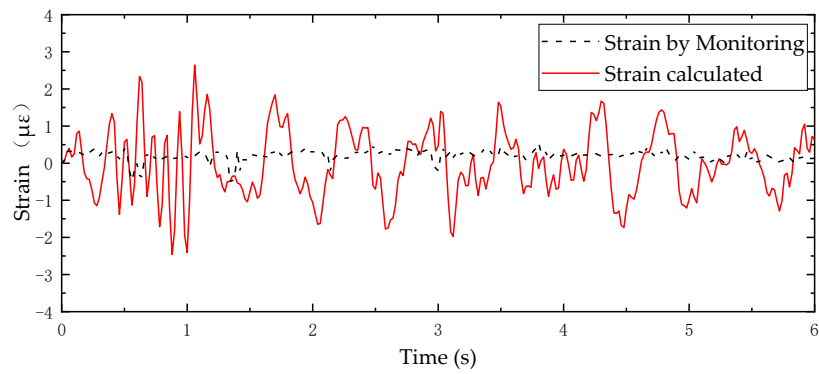

Figure S3: Comparison between measured dynamic strain and simulation results of DSS-03

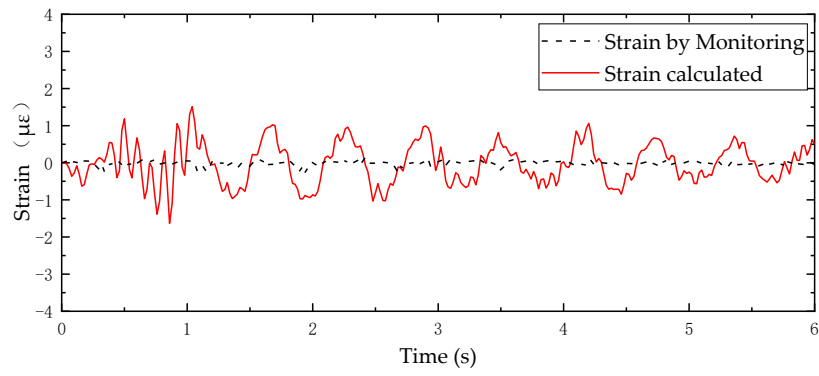

Figure S4: Comparison between measured dynamic strain and simulation results of DSS-04

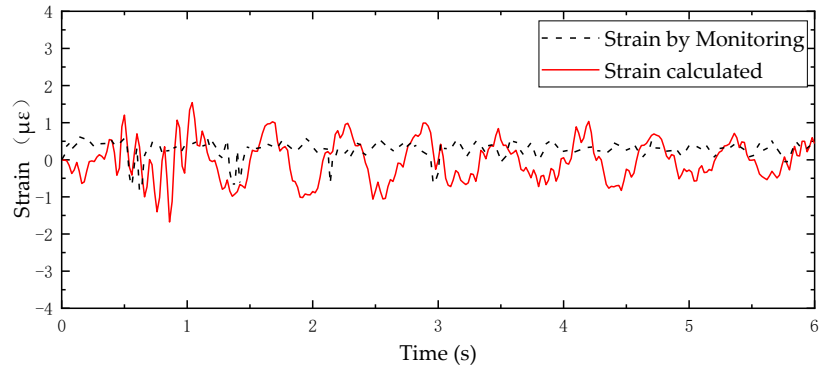

Figure S5: Comparison between measured dynamic strain and simulation results of DSS-05

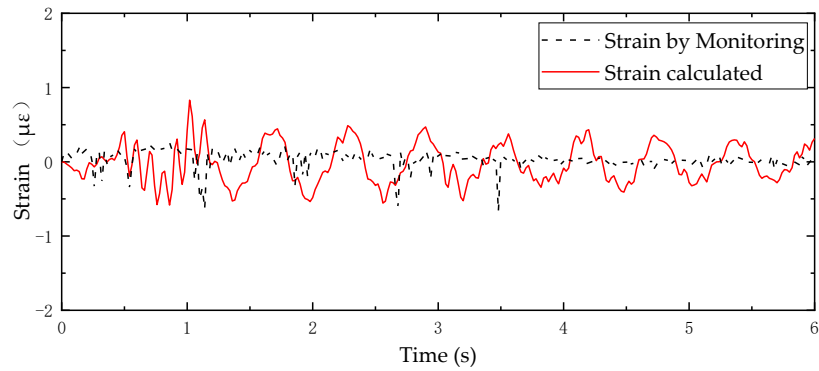

Figure S6: Comparison between measured dynamic strain and simulation results of DSS-07

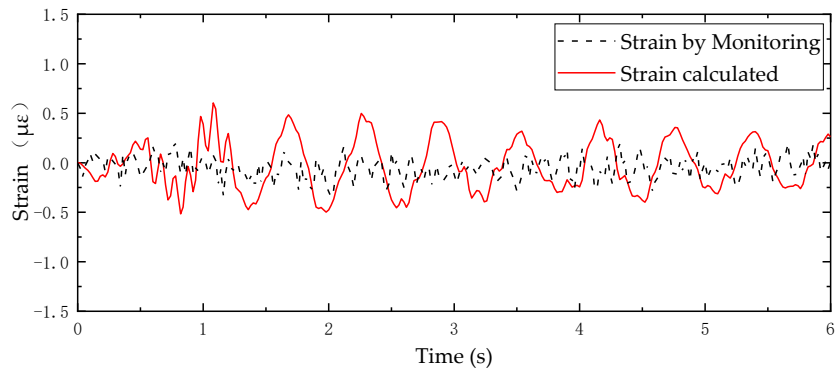

FigureS7: Comparison between measured dynamic strain and simulation results of DSS-08

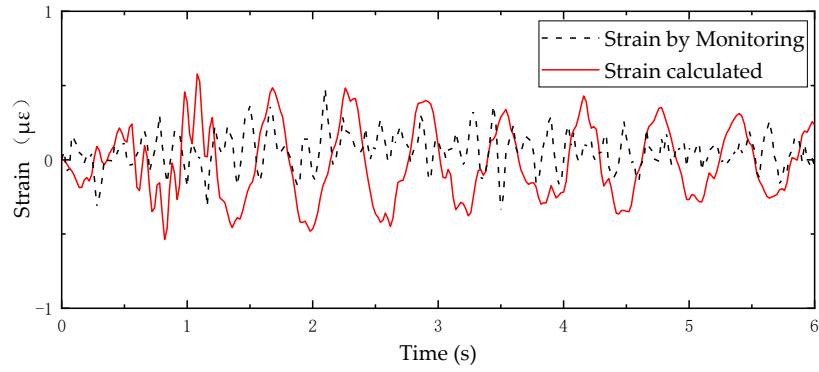

Figure S8: Comparison between measured dynamic strain and simulation results of DSS-09

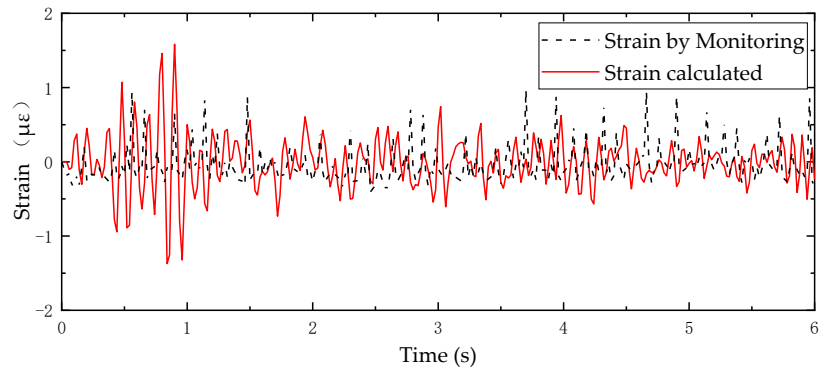

Figure S9: Comparison between measured dynamic strain and simulation results of DSS-11

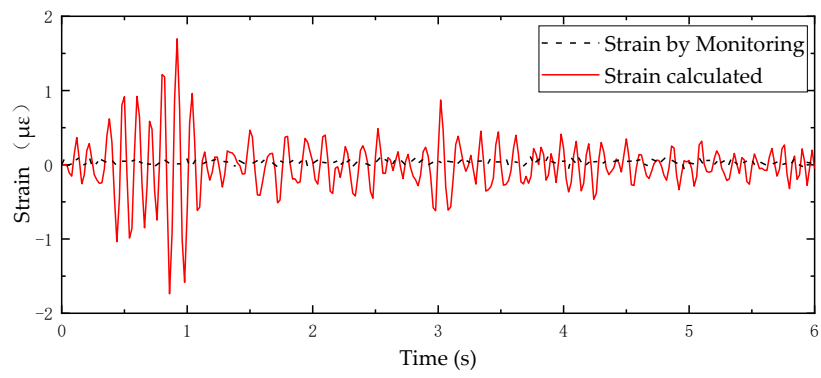

Figure S10: Comparison between measured dynamic strain and simulation results of DSS-13

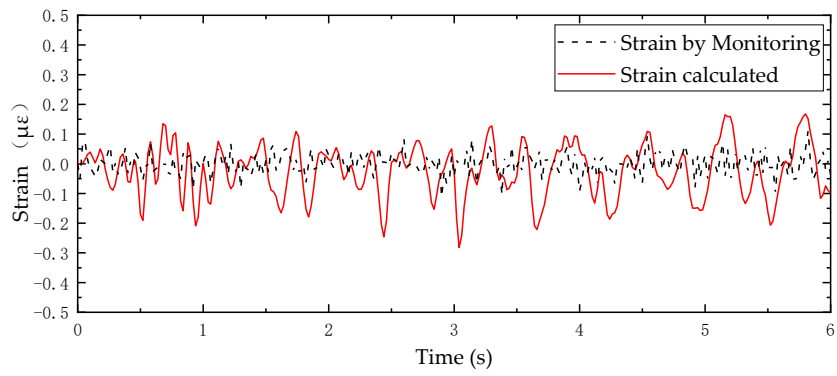

Figure S11: Comparison between measured dynamic strain and simulation results of DSS-16
